# Supplementary material
Source: PubMed Central journal article supplement (PMC3939865)
Supplement: 1401165111_pnas.201401165SI.pdf [file 1401165111_pnas.201401165SI.pdf]

# Supporting Information

Lee et al. 10.1073/pnas.1401165111

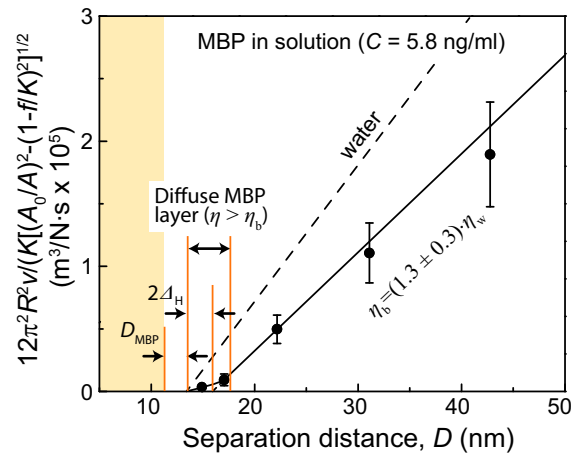

**Fig. S1.** Plot of viscosity measurement performed between normal myelin bilayers measured at myelin basic protein (MBP) concentration  $C = 5.8$  ng/mL.

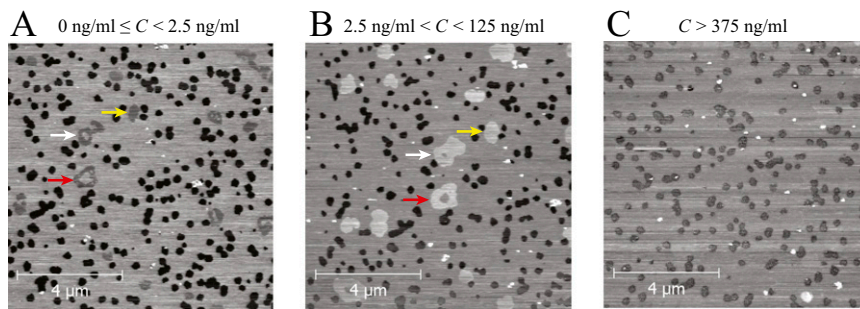

**Fig. S2.** Atomic force microscope (AFM) images of experimental allergic encephalomyelitis (EAE) model myelin bilayers at different  $C$ . Arrows indicate liquid-disordered phase ( $L_d$ ), and the same colors indicate the same areas (A) before and (B) after MBP adsorption to the  $L_d$  phase. Area fraction of bilayer holes (black) decreased from 14% to 12% when MBP was adsorbed to the  $L_d$  phase. The area fraction of bilayer holes may range from 0% to 20% depending on bilayer preparation procedures. Typically, applying stress to bilayers by exposing them to air for a few seconds and dipping them back into aqueous solution induces bilayer holes. When  $C$  is higher than 375 ng/mL, MBP adsorbs unselectively to  $L_d$ ,  $L_o$ , and bilayer holes.

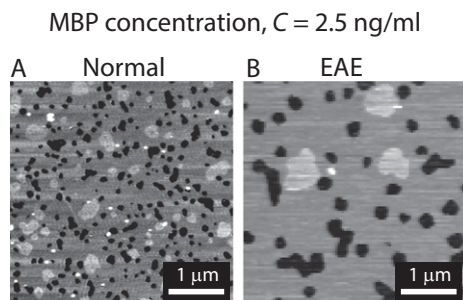

**Fig. S3.** AFM images of (A) normal and (B) EAE model myelin bilayers at  $C = 2.5$  ng/mL. MBP-adsorbed  $L_d$  phase domains of the normal bilayers were smaller but exhibited a higher area fraction (8.4%) compared with EAE bilayers, which had an area fraction of 5.5%.
